# Supplementary material
Source: PubMed Central journal article supplement (PMC7556151)
Supplement: advancesADV2020002502-suppl1.pdf [file advancesADV2020002502-suppl1.pdf]

## Supplementary Methods

Samples were analysed at three centers, largely divided by age. Samples for 55 patients, aged 1-12 years were analyzed at Great Ormond Street Hospital (GOSH), samples for 43 patients, aged 13-75 years were analyzed at University College London Hospital (UCLH) and samples for 18 patients, aged 2-17 years were analyzed at the University College London Cancer Institute (UCLCI). Samples analyzed at GOSH and UCLH were analyzed fresh for diagnostic purposes. All samples analyzed at UCLCI came from the Blood Cancer UK Childhood Leukaemia CellBank and were provided as viable cells frozen in liquid nitrogen. These samples were thawed according to standard lab practices in a 37C water bath, followed by immediate washing in RPMI cell media containing 10% fetal calf serum. To confirm concordance of results between centers and between fresh and frozen samples, 11 samples were analyzed both at two different centers and using a fresh and a frozen aliquot. Results demonstrated excellent concordance as shown in supplementary figure 2. In addition, while we acknowledge that the intensity of antigen expression may vary between fluorochromes, we have reported positivity rather than intensity, which showed good correlation between different antibodies used (Supplementary Figure 2).

Samples were analyzed using standard diagnostic flow cytometry methods at each institution. Samples were washed and suspended in flow buffer and stained with antibodies for 20 minutes. Following washing, samples were resuspended and analyzed on a multiparameter flow analyzer. Negative controls included isotype controls and gating on negative populations.

At University College London Hospitals, samples were stained using CD1a FITC, CD2 APC, CD3 PBE, CD4 APC, CD5 APC-A700, CD7 PE, CD8 PB and CD38 APC-A700 (All Beckman Coulter), run on a Navios Flow Cytometer equipped with Navios Software and analyzed using Kaluza Version 2 (Beckman Coulter). At Great Ormond Street Hospital for Children, samples were stained with CD1a PE, CD2 FITC/PE, sCD3 APC-H7, CD4 FITC, CD5 PerCP Cy5.5, CD38 FITC (All BD Bioscience), CD2 PerCpCy 5.5 (Pharmagen), CD7 APC (Invitrogen), CD8 Krome Orange (Beckman Coulter), run on a BD FACSCanto II or BD LSRFortessa X-20 flow cytometer with analysis using BD FACSDiva software (BD Biosciences). Samples from the Blood Cancer UK Childhood Leukaemia CellBank were processed at the University College London Cancer Institute. Samples were stained with CD1a BV421, CD2 FITC, CD3 BV785, CD4 FITC, CD5 PerCp 5.5, CD8 BV510 (All Biolegend) and CD7 APC (Thermo Fisher Scientific), run on a BD Fortessa X-20 flow cytometer and analyzed using FlowJo version 10 (BD Biosciences).

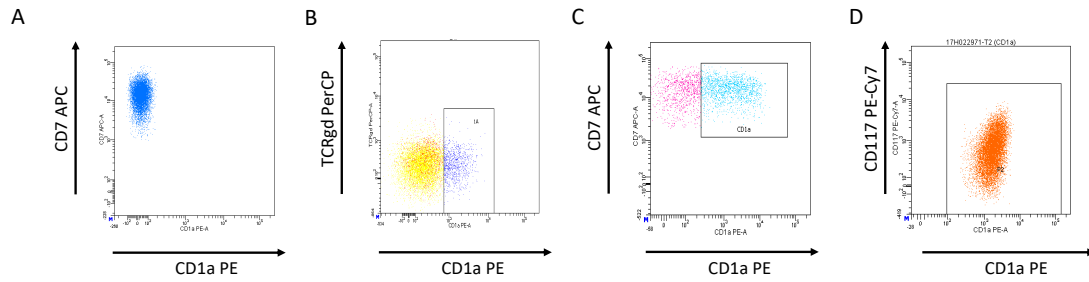

**Supplementary Figure 1. CD1a expression in T-ALL**

Representative flow cytometry plots demonstrating A) Negative, B) Partial Low and C) Diffuse and D) Full intermediate expression of CD1a in T-ALL.

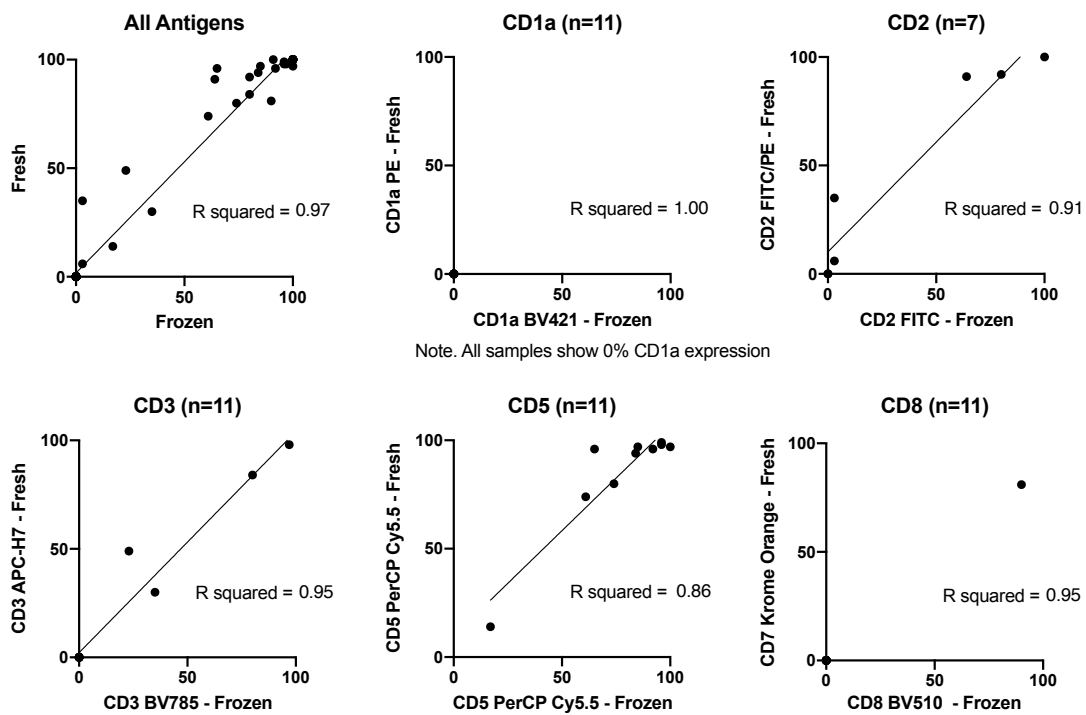

**Supplementary Figure 2. Concordance of antigen expression level in fresh and frozen samples** Plots show antigen expression levels between fresh and frozen aliquots of the same sample analysed at two different centers.

Supplementary Table 1. Clinical Details

| PatientID | Presentation/Relapse | Centre | Age at Diagnosis |
|-----------|----------------------|--------|------------------|
| 1         | Presentation         | UCLCI  | 10               |
| 1         | Relapse              | UCLCI  | 10               |
| 2         | Presentation         | UCH    | 75               |
| 3         | Presentation         | GOSH   | 6                |
| 3         | Relapse              | GOSH   | 6                |
| 4         | Presentation         | GOSH   | 7                |
| 4         | Relapse              | GOSH   | 7                |
| 4         | Relapse              | GOSH   | 7                |
| 5         | Presentation         | GOSH   | 2                |
| 6         | Presentation         | GOSH   | 8                |
| 7         | Presentation         | GOSH   | 8                |
| 8         | Presentation         | GOSH   | 10               |
| 9         | Presentation         | GOSH   | 5                |
| 10        | Presentation         | GOSH   | 11               |
| 11        | Presentation         | GOSH   | 8                |
| 12        | Presentation         | GOSH   | 8                |
| 13        | Presentation         | GOSH   | 1                |
| 13        | Relapse              | GOSH   | 1                |
| 14        | Presentation         | GOSH   | 2                |
| 15        | Presentation         | GOSH   | 8                |
| 16        | Presentation         | GOSH   | 6                |
| 17        | Presentation         | GOSH   | 3                |
| 18        | Presentation         | GOSH   | 7                |
| 19        | Presentation         | GOSH   | 1                |
| 19        | Relapse              | GOSH   | 1                |
| 19        | Relapse              | GOSH   | 1                |
| 20        | Presentation         | GOSH   | 6                |
| 21        | Presentation         | GOSH   | 7                |
| 22        | Presentation         | GOSH   | 5                |
| 23        | Presentation         | GOSH   | 1                |
| 24        | Presentation         | GOSH   | 3                |
| 24        | Relapse              | GOSH   | 3                |
| 25        | Presentation         | GOSH   | 6                |
| 26        | Presentation         | GOSH   | 8                |
| 27        | Presentation         | GOSH   | 2                |
| 28        | Presentation         | GOSH   | 7                |
| 28        | Relapse              | GOSH   | 7                |
| 29        | Presentation         | GOSH   | 5                |
| 30        | Presentation         | GOSH   | 7                |
| 31        | Presentation         | GOSH   | 9                |
| 31        | Relapse              | GOSH   | 9                |
| 32        | Presentation         | GOSH   | 10               |
| 33        | Presentation         | GOSH   | 10               |
| 34        | Presentation         | GOSH   | 12               |
| 34        | Relapse              | GOSH   | 12               |
| 35        | Presentation         | GOSH   | 4                |
| 36        | Presentation         | GOSH   | 8                |
| 37        | Presentation         | GOSH   | 4                |
| 38        | Presentation         | GOSH   | 8                |
| 39        | Presentation         | GOSH   | 9                |
| 39        | Relapse              | GOSH   | 9                |
| 40        | Presentation         | GOSH   | 1                |
| 41        | Presentation         | GOSH   | 11               |
| 42        | Presentation         | GOSH   | 3                |
| 43        | Presentation         | GOSH   | 5                |
| 43        | Relapse              | GOSH   | 5                |
| 44        | Presentation         | GOSH   | 5                |
| 45        | Presentation         | GOSH   | 8                |
| 46        | Presentation         | GOSH   | 10               |
| 47        | Presentation         | GOSH   | 10               |
| 48        | Presentation         | GOSH   | 6                |
| 49        | Presentation         | GOSH   | 10               |
| 50        | Presentation         | GOSH   | 5                |
| 51        | Presentation         | GOSH   | 6                |
| 52        | Presentation         | GOSH   | 11               |
| 53        | Presentation         | GOSH   | 4                |
| 54        | Presentation         | GOSH   | 11               |
| 55        | Presentation         | GOSH   | 2                |
| 55        | Refractory           | GOSH   | 2                |
| 56        | Presentation         | UCH    | 15               |
| 57        | Presentation         | UCH    | 18               |
| 58        | Presentation         | UCH    | 36               |
| 59        | Presentation         | UCH    | 33               |

|     |              |       |    |
|-----|--------------|-------|----|
| 60  | Presentation | UCH   | 23 |
| 61  | Presentation | UCH   | 25 |
| 62  | Presentation | UCH   | 38 |
| 63  | Presentation | UCH   | 25 |
| 63  | Refractory   | UCH   | 23 |
| 64  | Presentation | UCH   | 23 |
| 65  | Presentation | UCH   | 25 |
| 65  | Refractory   | UCH   | 25 |
| 66  | Presentation | UCH   | 35 |
| 66  | Refractory   | UCH   | 22 |
| 67  | Presentation | UCH   | 14 |
| 68  | Presentation | UCH   | 18 |
| 69  | Presentation | UCH   | 24 |
| 70  | Presentation | UCH   | 13 |
| 70  | Relapse      | UCH   | 13 |
| 70  | Relapse      | UCH   | 31 |
| 71  | Presentation | UCH   | 20 |
| 72  | Presentation | UCH   | 43 |
| 73  | Presentation | UCH   | 60 |
| 74  | Presentation | UCH   | 38 |
| 74  | Refractory   | UCH   | 38 |
| 75  | Presentation | UCH   | 68 |
| 76  | Presentation | UCH   | 14 |
| 77  | Presentation | UCH   | 16 |
| 78  | Presentation | UCH   | 18 |
| 79  | Presentation | UCH   | 19 |
| 80  | Presentation | UCH   | 45 |
| 81  | Presentation | UCH   | 32 |
| 81  | Relapse      | UCH   | 32 |
| 81  | Relapse      | UCH   | 32 |
| 82  | Presentation | UCH   | 26 |
| 83  | Presentation | UCH   | 21 |
| 84  | Presentation | UCH   | 28 |
| 85  | Presentation | UCH   | 21 |
| 85  | Relapse      | UCH   | 26 |
| 86  | Presentation | UCH   | 36 |
| 87  | Presentation | UCH   | 16 |
| 88  | Presentation | UCH   | 20 |
| 89  | Presentation | UCH   | 40 |
| 89  | Refractory   | UCH   | 25 |
| 90  | Presentation | UCH   | 14 |
| 91  | Presentation | UCH   | 14 |
| 91  | Relapse      | UCH   | 14 |
| 92  | Presentation | UCH   | 15 |
| 92  | Relapse      | UCH   | 15 |
| 92  | Relapse      | UCH   | 15 |
| 93  | Presentation | UCH   | 69 |
| 93  | Relapse      | UCH   | 69 |
| 94  | Presentation | UCH   | 13 |
| 95  | Presentation | UCH   | 25 |
| 96  | Presentation | UCH   | 40 |
| 97  | Presentation | UCH   | 47 |
| 98  | Presentation | GOSH  | 5  |
| 99  | Presentation | GOSH  | 8  |
| 99  | Relapse      | GOSH  | 10 |
| 100 | Presentation | UCLCI | 11 |
| 100 | Relapse      | UCLCI | 11 |
| 101 | Presentation | UCLCI | 17 |
| 102 | Presentation | UCLCI | 9  |
| 103 | Relapse      | UCLCI | 9  |
| 103 | Presentation | UCLCI | 2  |
| 104 | Presentation | UCLCI | 14 |
| 105 | Presentation | UCLCI | 5  |
| 106 | Presentation | UCLCI | 10 |
| 107 | Presentation | UCLCI | 13 |
| 108 | Presentation | UCLCI | 11 |
| 109 | Presentation | UCLCI | 14 |
| 110 | Presentation | UCLCI | 2  |
| 111 | Presentation | UCLCI | 15 |
| 112 | Presentation | UCLCI | 12 |
| 113 | Relapse      | UCLCI | 16 |
| 114 | Relapse      | UCLCI | 6  |
| 115 | Relapse      | UCLCI | 7  |
